# Supplementary material for: Non defect-stabilized thermally stable single-atom catalyst
Source: PubMed Central journal article supplement (PMC6335577; doi:10.1038/s41467-018-08136-3), 2019-01-16
Supplement: 41467_2018_8136_MOESM1_ESM.pdf [file 41467_2018_8136_MOESM1_ESM.pdf]

# **Non defect-stabilized thermally stable single-atom catalyst**

**Lang et al.**

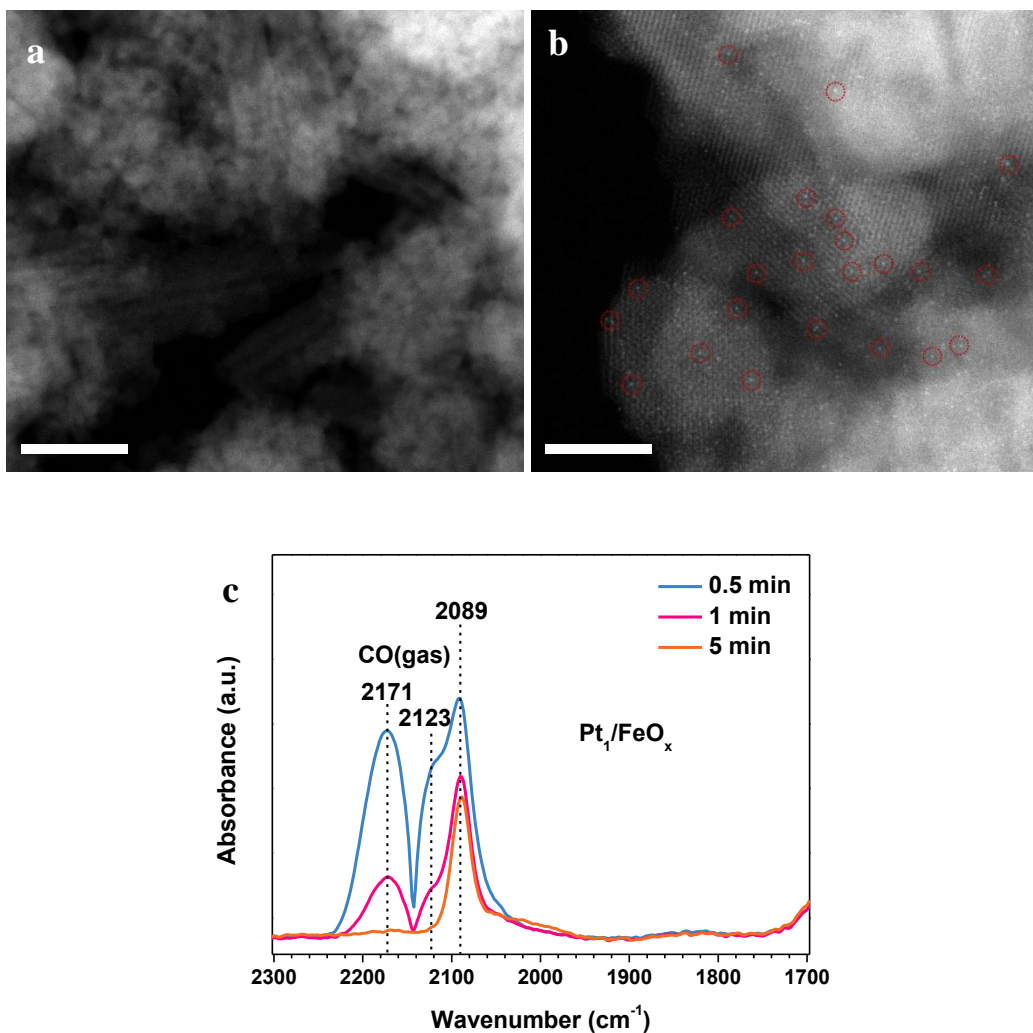

### Supplementary Figure 1. Characterization of $\text{Pt}_1/\text{FeO}_x$ .

(a) Dark-field STEM shows no evidence for Pt nanoparticles over the  $\text{FeO}_x$  support, 20 nm scale bar. (b) HR-STEM reveals isolated Pt atoms (circled in red), 5 nm scale bar. (c) DRIFT spectra of  $\text{Pt}_1/\text{FeO}_x$  were recorded after in situ heating at 200 °C under flowing He for 0.5 h, cooling to room temperature, saturation with CO (from a 1 vol% CO/He stream for 10 min), and subsequent flushing with He for 1-5 min to purge gas-phase CO (2,171 and 2,123  $\text{cm}^{-1}$  band) from the environmental cell. The residual band at 2,089  $\text{cm}^{-1}$  is assigned to linearly adsorbed CO; since this band position was independent of CO coverage it is attributed to molecules coordinated to isolated Pt atoms.

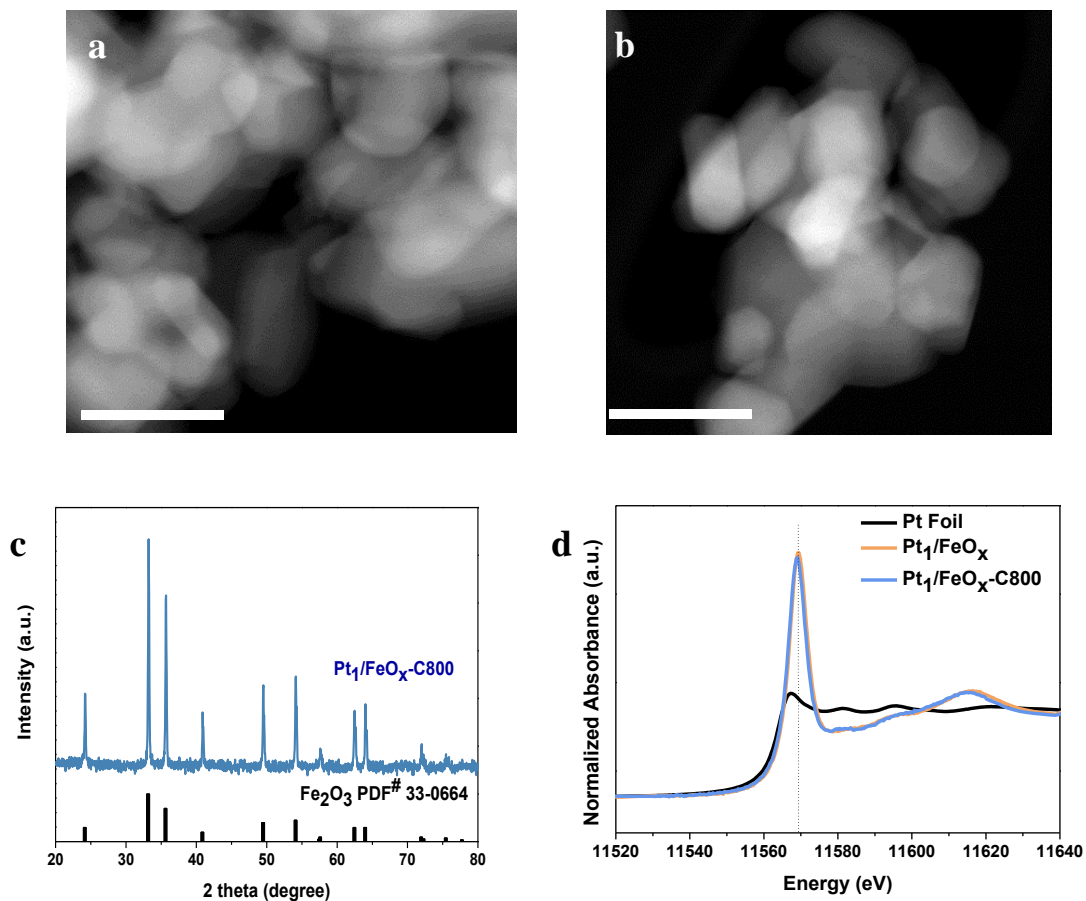

### Supplementary Figure 2. Characterization of Pt<sub>1</sub>/FeO<sub>x</sub>-C800.

(a-b) No Pt particles were observed for Pt<sub>1</sub>/FeO<sub>x</sub> by HR-STEM following calcination at 800 °C for 5 h under flowing air, demonstrating that Pt remained highly dispersed as a low (mono-) nuclear species. Scale bars: 100 nm. (c) Powder XRD of Pt<sub>1</sub>/FeO<sub>x</sub>-C800 only showed reflections characteristic of α-Fe<sub>2</sub>O<sub>3</sub>, confirming the absence of >2 nm Pt nanoparticles. (d) Pt L<sub>III</sub> XANES spectra of Pt<sub>1</sub>/FeO<sub>x</sub> before and after calcination, alongside a Pt foil reference, evidencing that the overwhelming majority of Pt species were in a high (likely +4) oxidation state.

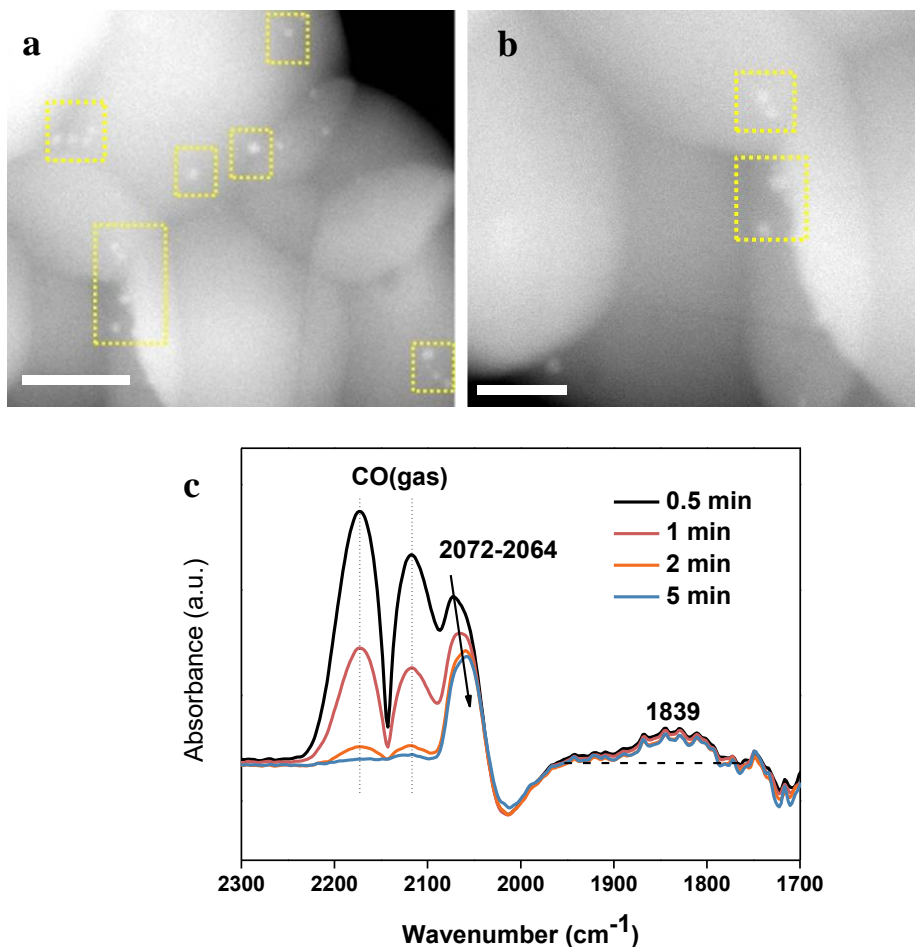

### Supplementary Figure 3. Characterization of 0.3Pt/Fe<sub>2</sub>O<sub>3</sub>-NP.

(a-b) HR-STEM highlighting the presence of Pt NPs (yellow squares) over the Fe<sub>2</sub>O<sub>3</sub> with a mean diameter of approximately 2 nm. 20 nm scale bar for panel a, and 10 nm scale bar for panel b. (c) DRIFT spectra of the 0.3Pt/Fe<sub>2</sub>O<sub>3</sub>-NP sample were recorded after in situ heating at 200 °C under flowing He for 0.5 h, cooling to room temperature, saturation with CO (from a 1 vol% CO/He stream for 10 min), and subsequent flushing with He for 1-5 min to purge gas-phase CO (2,171 and 2,123 cm<sup>-1</sup> band) from the environmental cell. The residual band at peak at 2,072 cm<sup>-1</sup> is assigned to CO adsorbed on Pt NPs, which shifts to 2,064 cm<sup>-1</sup> with decreasing CO coverage. The presence of Pt NPs is also indicated by the presence of a (weak) band at 1839 cm<sup>-1</sup> characteristic of a bridge-bound Pt<sub>2</sub>-CO species.

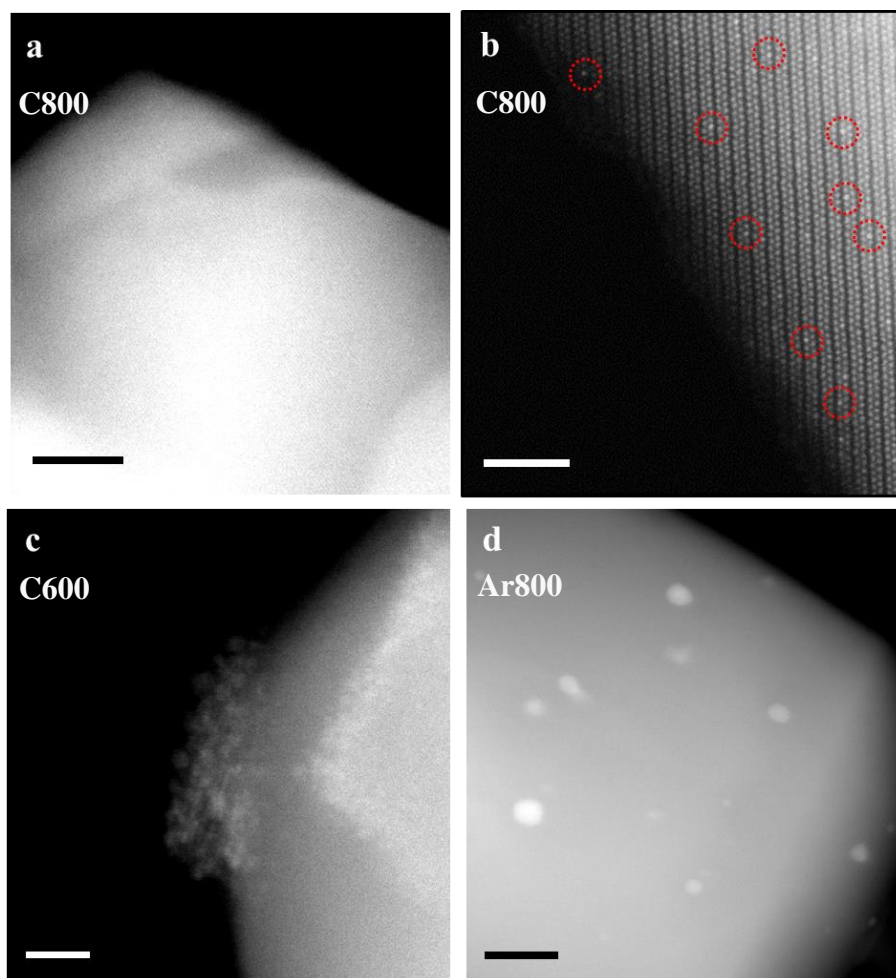

**Supplementary Figure 4. Characterization of 0.3Pt/Fe<sub>2</sub>O<sub>3</sub>-C800, 0.3Pt/Fe<sub>2</sub>O<sub>3</sub>-C600 and 0.3Pt/Fe<sub>2</sub>O<sub>3</sub>-Ar800.**

(a) Low resolution and (b) HRSTEM images of 0.3Pt/Fe<sub>2</sub>O<sub>3</sub>-C800 showing absence of Pt NPs and presence of isolated Pt atoms (circled in red) perfectly aligned with Fe sites in the oxide support lattice. 10 nm scale bar for panel a, and 2 nm scale bar for panel b. (c) Low resolution STEM image of 0.3Pt/Fe<sub>2</sub>O<sub>3</sub>-C600 resulting from a lower temperature (600 °C) calcination of the parent 0.3Pt/Fe<sub>2</sub>O<sub>3</sub>-NP evidences loosely coordinated Pt NPs over the support. 5 nm scale bar. (d) Low resolution STEM images of 0.3Pt/Fe<sub>2</sub>O<sub>3</sub>-Ar800 demonstrating Pt NP formation following 800 °C annealing under Ar. 20 nm scale bar. Thermal treatment under an oxidizing environment disperses Pt NPs, whereas treatment under an inert environment promotes their aggregation.

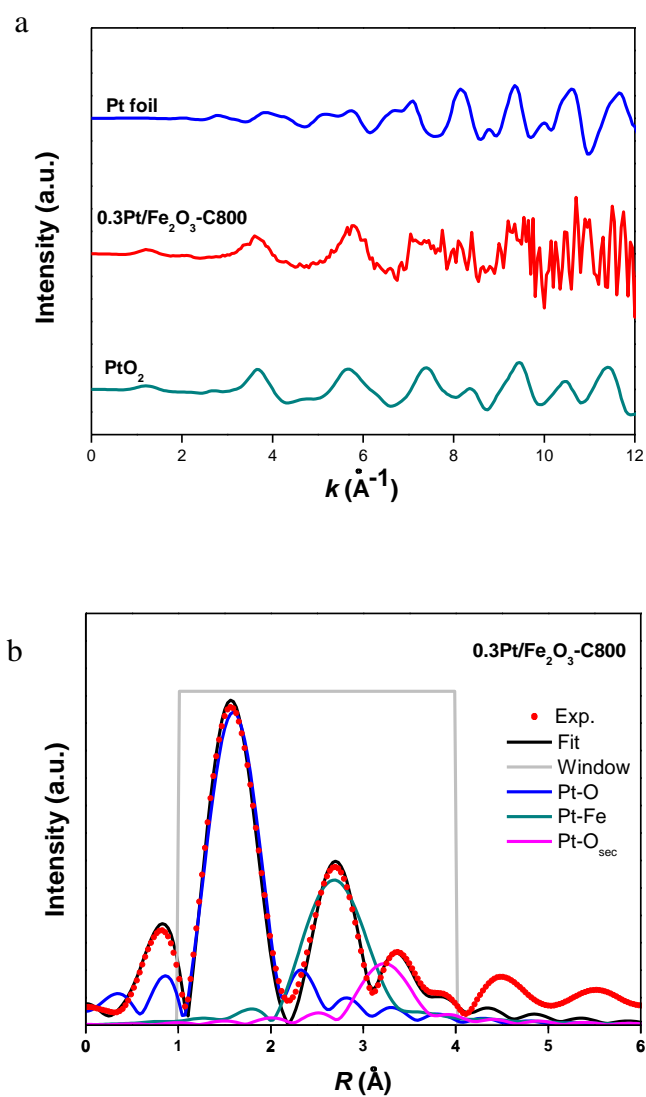

**Supplementary Figure 5. EXAFS characterization.**

(a)  $k^3$ -weighted EXAFS spectra of the 0.3Pt/Fe<sub>2</sub>O<sub>3</sub>-C800, PtO<sub>2</sub>, and Pt foil. (b) Experimental and fitted FT radial distribution functions of 0.3Pt/Fe<sub>2</sub>O<sub>3</sub>-C800.

**Supplementary Table 1. Fitted EXAFS parameters for Pt foil, 0.3Pt/Fe<sub>2</sub>O<sub>3</sub>-C800, and PtO<sub>2</sub>.**

| Samples                                    | Shell               | <i>N</i> | <i>R</i> (Å) | $\sigma^2 \times 10^2$ (Å <sup>2</sup> ) | r-factor (%) |
|--------------------------------------------|---------------------|----------|--------------|------------------------------------------|--------------|
| Pt Foil                                    | Pt-Pt               | 12.0     | 2.76         | 0.34                                     | 0.019        |
| 0.3Pt/Fe <sub>2</sub> O <sub>3</sub> -C800 | Pt-O                | 4.20     | 2.00         | 0.04                                     | 0.009        |
|                                            | Pt-Fe               | 6.06     | 3.07         | 0.94                                     | 0.009        |
|                                            | Pt-O <sub>sec</sub> | 6.36     | 3.72         | 0.31                                     | 0.009        |
| PtO <sub>2</sub>                           | Pt-O                | 6.00     | 2.01         | 0.27                                     | 0.010        |
|                                            | Pt-Pt               | 6.00     | 3.12         | 0.40                                     | 0.010        |
|                                            | Pt-O <sub>sec</sub> | 12.00    | 3.67         | 0.48                                     | 0.010        |

*N* is the coordination number for the absorber-backscatterer pair. *R* is the average absorber–backscatterer distance.  $\sigma^2$  is the Debye–Waller factor. The accuracies of the above parameters were estimated as *N*, ±20%; *R*, ±1%;  $\sigma^2$ , ±20%. The data ranges used for data fitting in *k*-space ( $\Delta k$ ) are 3.0-9.5 Å<sup>-1</sup> for 0.3Pt/Fe<sub>2</sub>O<sub>3</sub>-C800, and PtO<sub>2</sub> and 3.0-12 Å<sup>-1</sup> for Pt foil; in *R*-space ( $\Delta R$ ) 1.0 -4.0 Å for 0.3Pt/Fe<sub>2</sub>O<sub>3</sub>-C800, and PtO<sub>2</sub>, 1.0 -2.0 Å for Pt foil, respectively. Pt-O<sub>sec</sub> indicates the second nearest neighbor O shell.

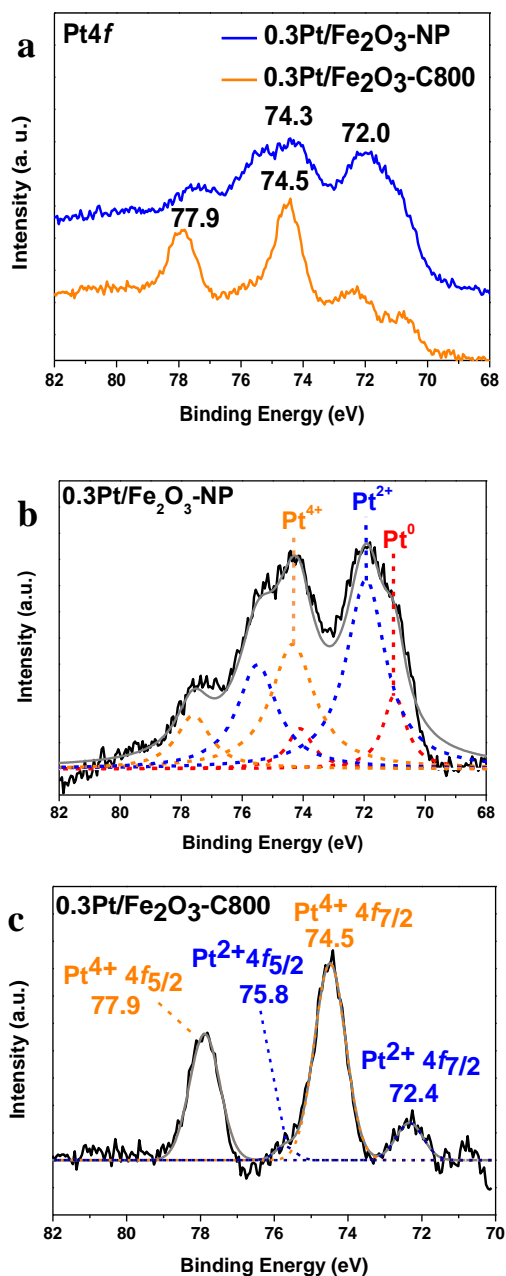

**Supplementary Figure 6. Pt 4f XP spectra of 0.3Pt/Fe<sub>2</sub>O<sub>3</sub>-NP and 0.3Pt/Fe<sub>2</sub>O<sub>3</sub>-C800.**

(a) High-resolution Pt 4f XP spectra of 0.3Pt/Fe<sub>2</sub>O<sub>3</sub>-NP and 0.3Pt/Fe<sub>2</sub>O<sub>3</sub>-C800. (b) Deconvolution analysis of Pt 4f XP spectra of 0.3Pt/Fe<sub>2</sub>O<sub>3</sub>-NP exhibits a mix of metallic (Pt<sup>0</sup> 4f<sub>7/2</sub>~71.0 eV, Pt<sup>0</sup> 4f<sub>5/2</sub>~74.1 eV) and partially oxidized platinum (Pt<sup>2+</sup> 4f<sub>7/2</sub>~71.9 eV, Pt<sup>2+</sup> 4f<sub>5/2</sub>~75.5 eV, Pt<sup>4+</sup> 4f<sub>7/2</sub>~74.3 eV, Pt<sup>4+</sup> 4f<sub>5/2</sub>~77.6 eV). The presence of Pt<sup>2+</sup> and Pt<sup>4+</sup> may come from surface oxidation of Pt NPs during calcination. (c) 0.3Pt/Fe<sub>2</sub>O<sub>3</sub>-C800 evidences predominantly high binding energy (+4) platinum.



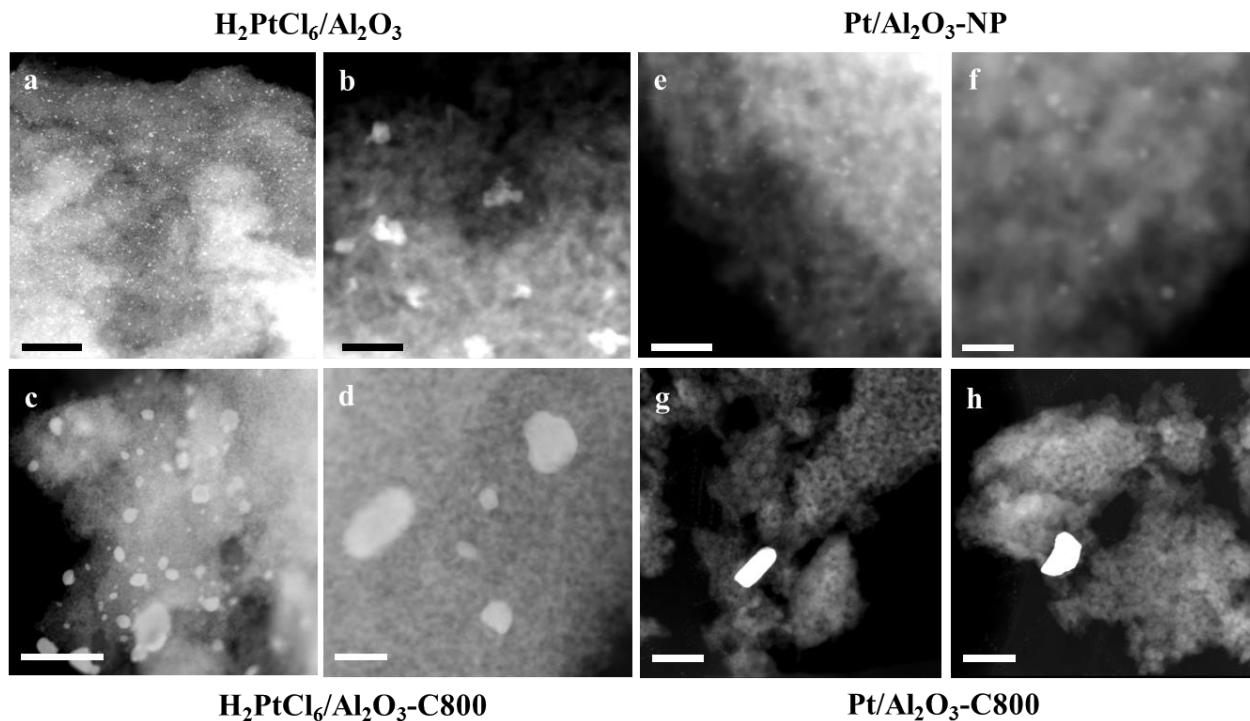

**Supplementary Figure 7. Characterization of  $\text{H}_2\text{PtCl}_6$  or Pt NP functionalized  $\text{Al}_2\text{O}_3$  before and after calcination.**

(a-b) Low resolution STEM images of 1 wt%  $\text{H}_2\text{PtCl}_6$  deposited by aqueous wet impregnation on  $\text{Al}_2\text{O}_3$  reveal <10 nm Pt nanoparticles. 200 nm scale bar for panel a, and 20 nm scale bar for panel b. (c-d) Subsequent high temperature calcination at 800 °C for 5 h results in significant particle sintering over alumina. 200 nm scale bar for panel c, and 50 nm scale bar for panel d. (e-f) Low resolution STEM images of 0.3 wt% Pt NP deposited on  $\text{Al}_2\text{O}_3$  reveal 2-3 nm Pt nanoparticles. 20 nm scale bar for panel e, and 10 nm scale bar for panel f. (g-h) Calcination at 800 °C in air for 5 h results in severe aggregation, in contrast to observations over  $\text{Fe}_2\text{O}_3$ . Scale bar: 50 nm. Alumina is unable to stabilize atomically-dispersed Pt species.

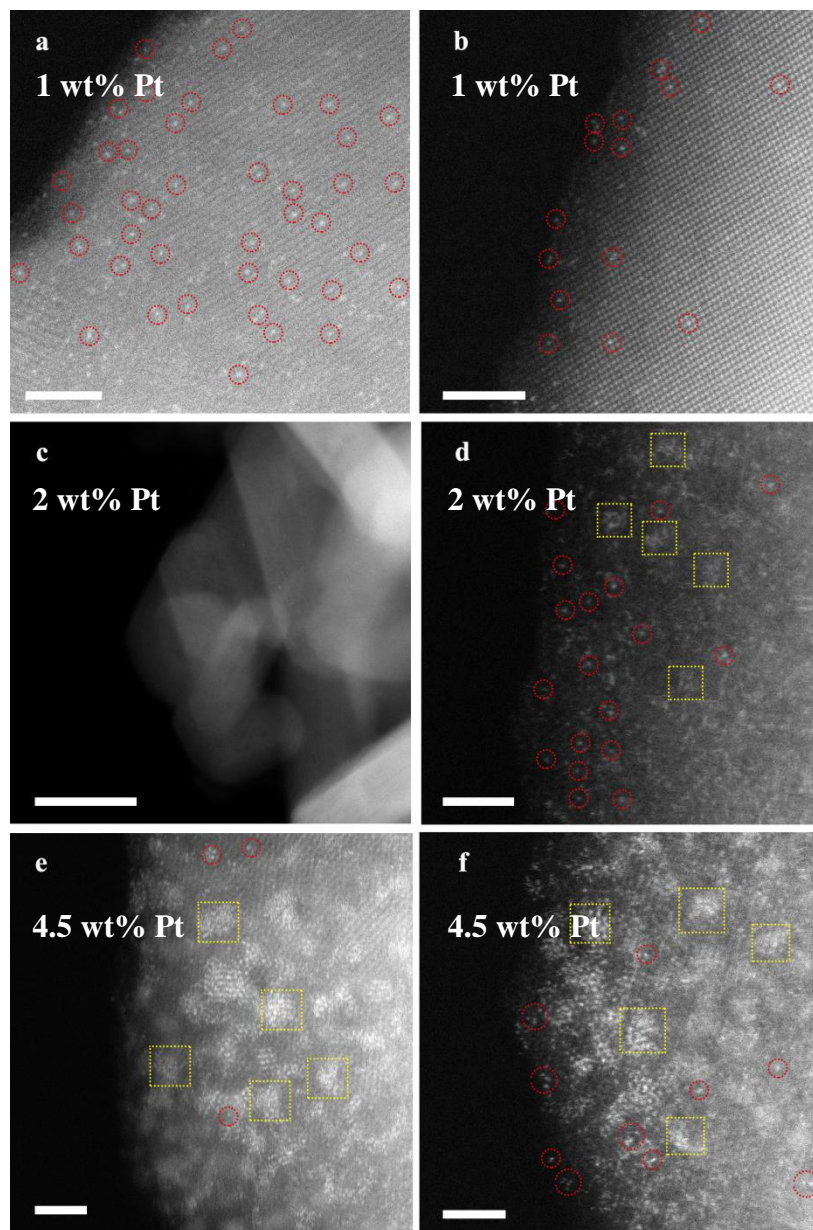

**Supplementary Figure 8. Aberration-corrected HAADF-STEM images of  $x\text{Pt}/\text{Fe}_2\text{O}_3\text{-C800}$  with different Pt loadings.**

(a-b) HRSTEM images of  $1\text{Pt}/\text{Fe}_2\text{O}_3\text{-C800}$  exhibit only isolated Pt atoms (circled in red): 2 nm scale bars. (c-d) Corresponding images for  $2\text{Pt}/\text{Fe}_2\text{O}_3\text{-C800}$  evidence a significant number of isolated Pt atoms, accompanied by a small number of Pt clusters (highlighted in yellow squares). 50 nm scale bar for panel c, and 2 nm scale bar for panel d. (e-f) HRSTEM images of  $4.5\text{Pt}/\text{Fe}_2\text{O}_3\text{-C800}$  also reveal some isolated Pt atoms, accompanied by a higher density of larger Pt clusters. 2 nm scale bars.

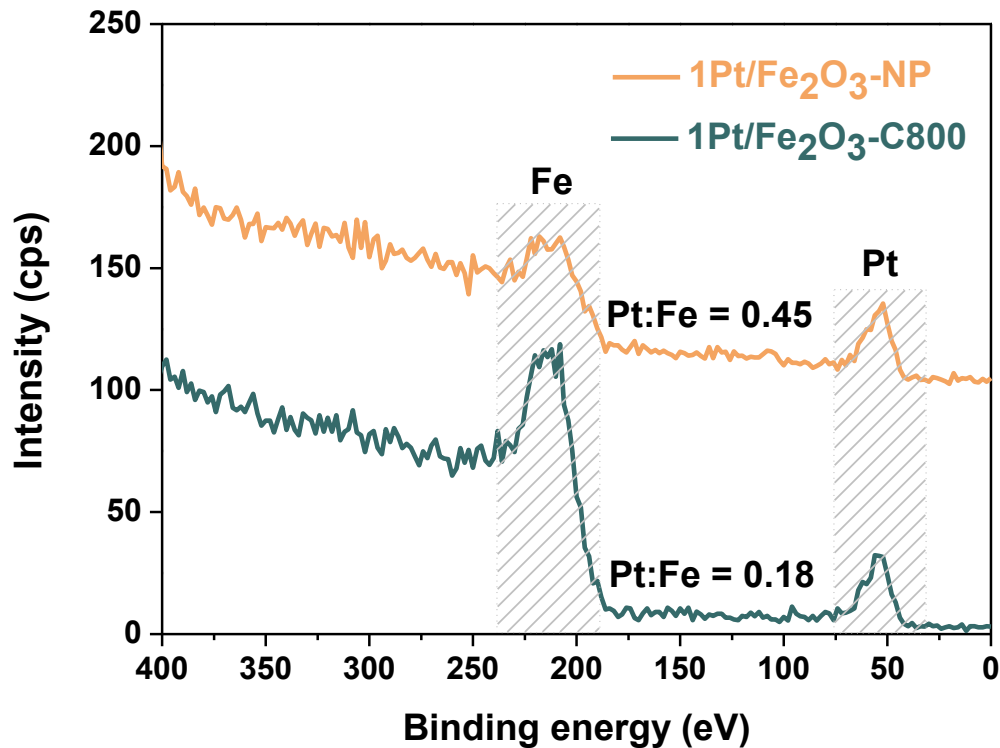

**Supplementary Figure 9. LEIS data for 1Pt/Fe<sub>2</sub>O<sub>3</sub>-NP before and after calcination.**

Low energy He<sup>+</sup> ion scattering spectroscopy reveals that the Pt:Fe ratio within the outermost surface layer decreased from 0.45 to 0.18 as the calcination temperature was increased from 500 °C to 800 °C under flowing air. This is consistent with migration of Pt atoms into the near sub-surface region of the Fe<sub>2</sub>O<sub>3</sub> support (ICP-AES elemental analysis confirmed no loss of Pt due to evaporation).

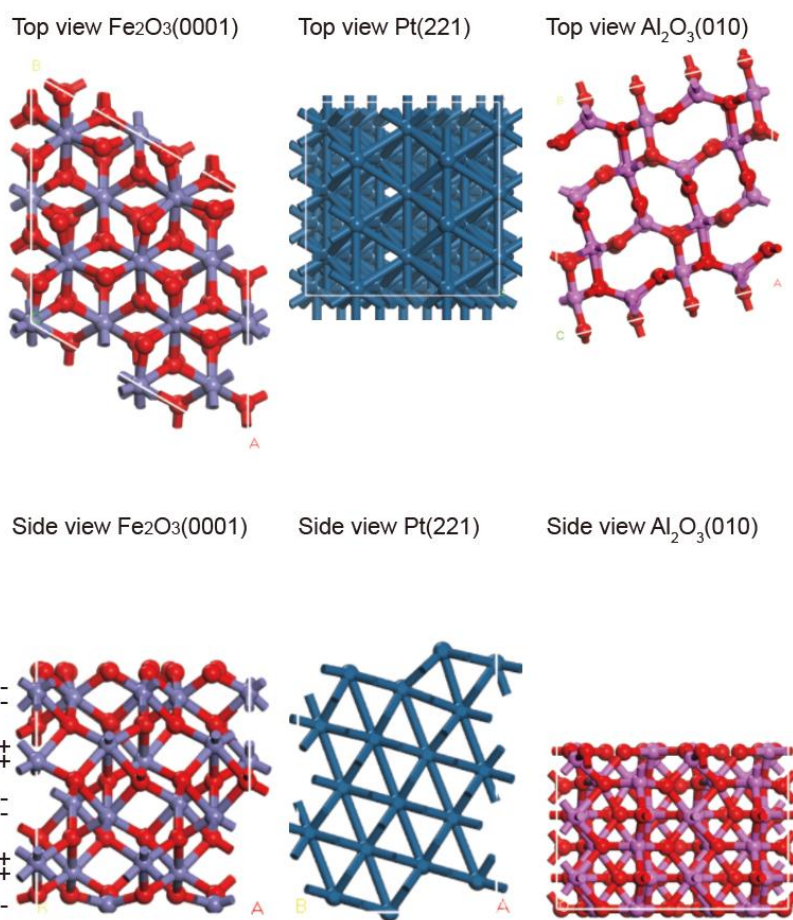

**Supplementary Figure 10. Computational model of  $\text{Fe}_2\text{O}_3(0001)$ ,  $\text{Pt}(221)$  stepped, and  $\theta\text{-Al}_2\text{O}_3(010)$  surfaces.**

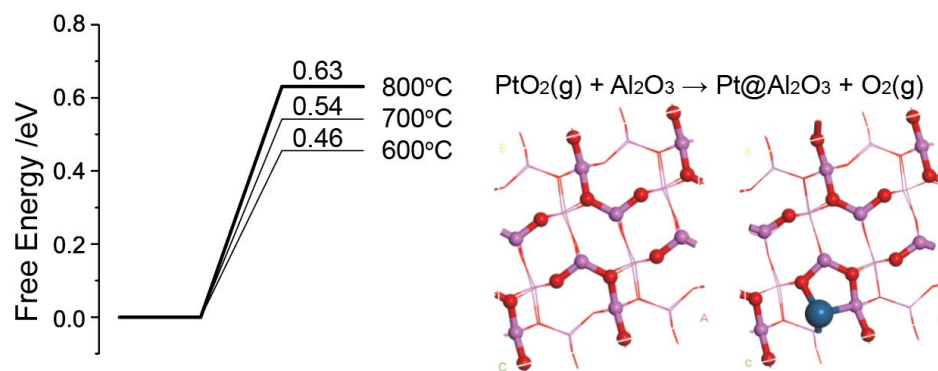

**Supplementary Figure 11. Optimized structures and free energy profiles of  $\text{PtO}_2$  anchoring step on  $\text{Al}_2\text{O}_3(010)$  surface.**

**Supplementary Table 2. Bader charge analysis of Pt atoms, and Pt-O bond lengths for gas and condensed phase  $\text{PtO}_2$ ,  $\text{Pt/Fe}_2\text{O}_3$ , and  $\text{Pt/Al}_2\text{O}_3$ .**

|                                              | $\text{PtO}_2(\text{gas})$ | $\text{PtO}_2(\text{bulk})$ | $\text{Pt/Fe}_2\text{O}_3$ | $\text{Pt/Al}_2\text{O}_3$ |
|----------------------------------------------|----------------------------|-----------------------------|----------------------------|----------------------------|
| <b>Bader charge of Pt / <math>e^-</math></b> | +1.61                      | +1.73                       | +1.43                      | -0.14                      |
| <b>Pt-O bond length / Å</b>                  | 1.70                       | 2.04                        | 1.90, 1.94,<br>1.95, 1.95  | 2.35, 2.36                 |

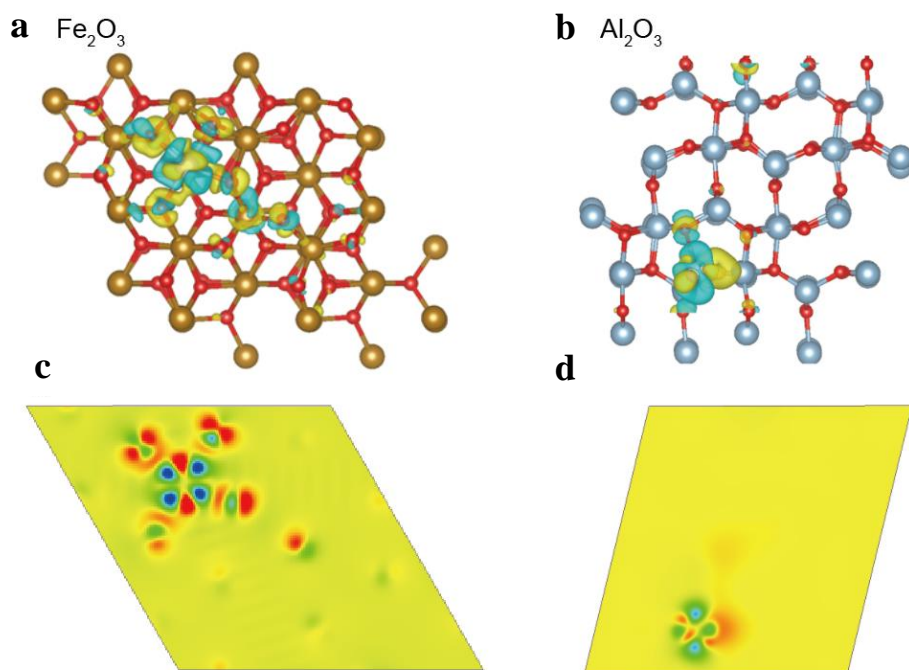

**Supplementary Figure 12. Calculated charge density differences for Pt adatoms on the (a)  $\text{Fe}_2\text{O}_3(0001)$  and (b)  $\text{Al}_2\text{O}_3(010)$  surface. Yellow and blue areas represent charge increase and reduction, respectively. The cut-off of the density-difference isosurfaces equals  $0.005 \text{ electrons } \text{\AA}^{-3}$ . (c, d) Two dimensional representation of charge difference at the Pt horizontal face.**



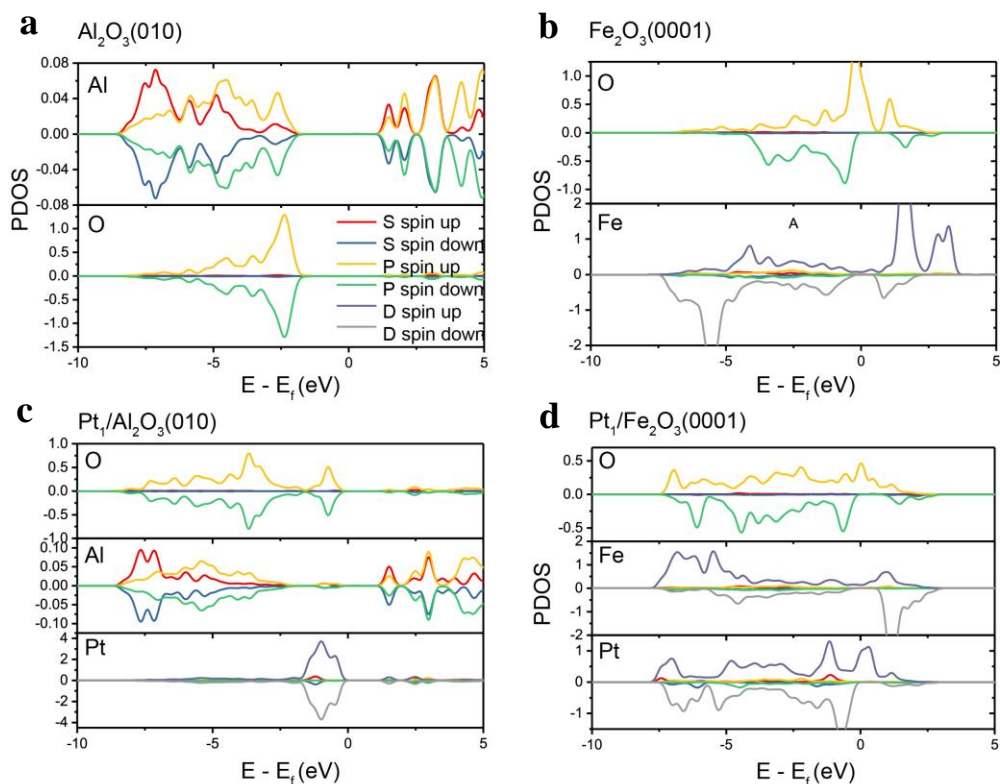

**Supplementary Figure 13. Projected electronic density of states (PDOS) of O, Al, Fe, and Pt on (a)  $\text{Al}_2\text{O}_3(010)$ , (b)  $\text{Fe}_2\text{O}_3(0001)$ , (c)  $\text{Pt}_1/\text{Al}_2\text{O}_3(010)$ , and (d)  $\text{Pt}_1/\text{Fe}_2\text{O}_3(0001)$  surfaces.**

**Analysis of Pt single atom stabilization over  $\text{Fe}_2\text{O}_3$  versus  $\text{Al}_2\text{O}_3$ .** The driving energy for the stabilization of Pt on  $\text{Fe}_2\text{O}_3$  arises from Pt-O bond formation. As shown in Supplementary Figure 12, we calculated the charge density difference of  $\text{Pt}_1/\text{Fe}_2\text{O}_3(0001)$  and  $\text{Pt}_1/\text{Al}_2\text{O}_3(010)$ , defined as  $\Delta\rho = \rho_{\text{Pt+slab}} - \rho_{\text{slab}} - \rho_{\text{Pt}}$ . For  $\text{Pt}_1/\text{Fe}_2\text{O}_3(0001)$ , there are four strong chemical bonds between Pt and adjacent O resulting from  $d$ - $p$  orbital interactions, which result in an oxidized Pt with +1.43 |e| from Bader charge analysis. Here +1.43 |e| is slightly lower than the formal charge of Pt in gas  $\text{PtO}_2$  and bulk  $\text{PtO}_2$  (Supplementary Table 2). However, the Pt-O bond lengths on the  $\text{Fe}_2\text{O}_3$  surface are around 1.94 Å, which is even shorter than in crystalline  $\text{PtO}_2$ . In contrast, Pt-O bonds on the  $\text{Al}_2\text{O}_3$  surface are much longer at 2.35 Å, suggesting a far weaker interaction of Pt with surface O atoms.

Comparing the projected electronic density of states (PDOS) for  $\text{Fe}_2\text{O}_3(0001)$  and  $\text{Al}_2\text{O}_3(010)$  as shown in Supplementary Figure 13, the  $s$  and  $p$  orbitals of  $\text{O}^{2-}$  at the  $\text{Al}_2\text{O}_3(010)$  surface are fully occupied, and the band gap of the  $\text{Al}^{3+}$  system is too large to accept electrons from Pt, i.e. the strong Al-O bonding network prevents any significant metal-support interaction with Pt adatoms.

This scenario contrasts with  $O^{n-}$  at the  $Fe_2O_3(0001)$  surface, where the orbitals are not fully occupied. Moreover, the reducibility of  $Fe^{m+}$  ions implies that it remains to be able to accept electrons from Pt adatoms, thus favoring a strong metal-support interaction.

**Details of free energy calculation.** The chemical equation of evaporation of one row of Pt or one row of  $PtO_2$ , i.e. three Pt or three  $PtO_2$  in each slab model, at step of Pt(221) can be written as:

- (1)  $Pt(221 \text{ slab}) \rightarrow Pt(221 \text{ slab, with one row Pt evaporated}) + 3Pt_1(\text{gas})$
- (2)  $Pt(\text{oxygen covered 221 slab}) \rightarrow Pt(\text{oxygen covered 221 slab, with one row } PtO_2 \text{ evaporated}) + 3PtO_2(\text{gas})$

The chemical equation for adding  $PtO_2$  to  $Fe_2O_3(0001)$  or  $\theta-Al_2O_3(010)$  surfaces is:

- (3)  $PtO_2(\text{g}) + Fe_2O_3 \rightarrow Pt_1@Fe_2O_3 + O_2(\text{g})$
- (4)  $PtO_2(\text{g}) + Al_2O_3 \rightarrow Pt@Al_2O_3 + O_2(\text{g})$

Thus, the energy changes at 0 K (neglecting zero point energy (ZPE)) are:

$$\Delta E(1) = (E_{Pt(221 \text{ slab, with one row Pt evaporated})} + 3E_{Pt(\text{gas})} - E_{Pt(221 \text{ slab})})/3 = 6.00 \text{ eV}$$

$$\Delta E(2) = (E_{Pt(\text{oxygen covered 221 slab, with one row } PtO_2 \text{ evaporated})} + 3E_{PtO_2(\text{gas})} - E_{Pt(\text{oxygen covered 221 slab})})/3 = 2.38 \text{ eV}$$

$$\Delta E(3) = E_{Pt_1@Fe_2O_3} + E_{O_2(\text{g})} - E_{Fe_2O_3} + E_{PtO_2(\text{g})} = -3.16 \text{ eV}$$

$$\Delta E(4) = E_{Pt@Al_2O_3} + E_{O_2(\text{g})} - E_{Al_2O_3} + E_{PtO_2(\text{g})} = -0.07 \text{ eV}$$

The standard Gibbs free energies of  $G_{O_2(\text{g})}$ ,  $G_{Pt(\text{g})}$ , and  $G_{PtO_2(\text{g})}$  were calculated using the following equations, taking into account the individual translational  $E_t$  and  $S_t$ , vibrational  $E_v$  and  $S_v$ , rotational  $E_r$  and  $S_r$ , and ZPE contributions:

$$G = H - TS = U + k_b T - TS$$

$$S = S_t + S_v + S_r$$

$$U = E_{DFT} + ZPE + E_t + E_v + E_r$$

where  $E_{DFT}$  are the electronic energies from DFT calculations.  $S_t$ ,  $S_v$ ,  $S_r$ ,  $E_t$ ,  $E_v$ , and  $E_r$  are obtained by including partition functions,  $Q$ , according to:

$$U = k_b T^2 \left( \frac{\partial \ln Q}{\partial T} \right)_{N,V}$$



$$S = k_b \ln Q + k_b T \left( \frac{\partial \ln Q}{\partial T} \right)_{N,V}$$

$$\ln Q = N \left[ \ln \left( \frac{q_{trans}}{N} \right) + 1 \right] + N \ln q_{rot} + N \ln q_{vib} + N \ln q_{ele}$$

For slab models, the entropy and enthalpy corrections to free energies are neglected in this work.

The resulting corrections to the ZPE,  $H$ ,  $S$ , and  $G$  at various temperatures are given below:

**Supplementary Table 3. Free energy corrections of Pt(g), PtO<sub>2</sub>(g), and O<sub>2</sub>(g) at 873, 973, and 1073 K.**

|                        |        | ZPE (eV) | $H_{0 \rightarrow T}$ (eV) | $S$ (eV/K) | $G_{0 \rightarrow T}$ (eV) |
|------------------------|--------|----------|----------------------------|------------|----------------------------|
| Pt(gas)                | 873 K  | 0.00     | 0.19                       | 0.00204    | -1.59                      |
|                        | 973 K  | 0.00     | 0.21                       | 0.00206    | -1.80                      |
|                        | 1073 K | 0.00     | 0.23                       | 0.00208    | -2.01                      |
| PtO <sub>2</sub> (gas) | 873 K  | 0.14     | 0.60                       | 0.00333    | -2.31                      |
|                        | 973 K  | 0.14     | 0.66                       | 0.00340    | -2.65                      |
|                        | 1073 K | 0.14     | 0.72                       | 0.00346    | -2.99                      |
| O <sub>2</sub> (gas)   | 873 K  | 0.10     | 0.38                       | 0.00248    | -1.79                      |
|                        | 973 K  | 0.10     | 0.41                       | 0.00252    | -2.04                      |
|                        | 1073 K | 0.10     | 0.45                       | 0.00256    | -2.29                      |

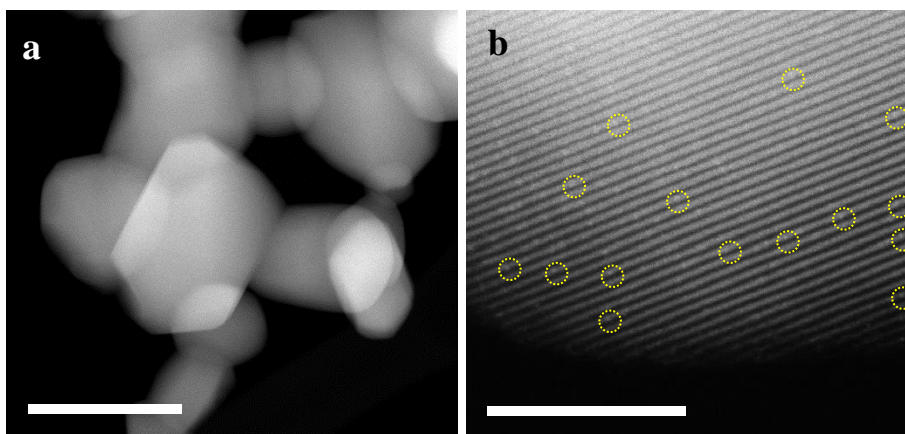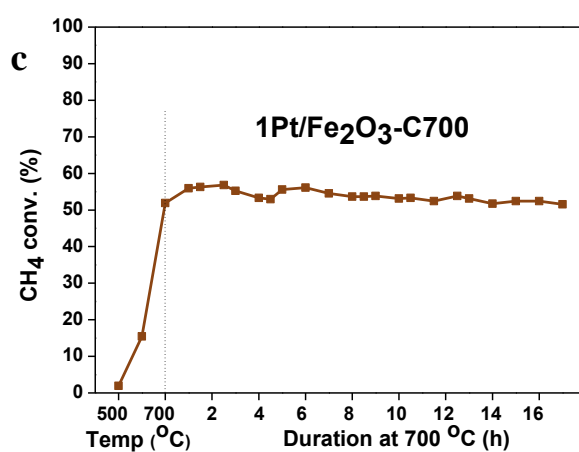

**Supplementary Figure 14. Aberration-corrected HAADF-STEM images of the used 1Pt/Fe<sub>2</sub>O<sub>3</sub>-NP catalyst, and catalytic performance of Pt SAC.**

(a) STEM showed no evidence of Pt NP in the 1Pt/Fe<sub>2</sub>O<sub>3</sub>-NP catalyst following 6 h methane oxidation at 700 °C, rather (b) HRSTEM evidenced only isolated Pt atoms (circled in yellow), demonstrating that Pt NPs are dispersed into single atoms during reaction. 200 nm scale bar for panel a, and 5 nm scale bar for panel b. (c) 1Pt/Fe<sub>2</sub>O<sub>3</sub>-NP was pre-treated under 10 vol% O<sub>2</sub>/He flow (30 mL min<sup>-1</sup>) at 700 °C for 5 h to form a Pt SAC (1Pt/Fe<sub>2</sub>O<sub>3</sub>-C700). The gas feed was subsequently switched to 0.5 vol% CH<sub>4</sub> / 3 vol% O<sub>2</sub> / 97 % He balance (30 mL min<sup>-1</sup>) to evaluate its performance in methane oxidation. CH<sub>4</sub> conversion remained stable ~50 % over the Pt SAC for 16 h at 700 °C despite the harsh reaction conditions.

**Supplementary Table 4. Reactivity comparison of 1Pt/Fe<sub>2</sub>O<sub>3</sub>-NP and 1Pt/Fe<sub>2</sub>O<sub>3</sub>-C700.**

| Entry                                                 | Usage<br>(mg) | Space velocity<br>(mL h <sup>-1</sup> g <sub>cat</sub> <sup>-1</sup> ) | Specific rate<br>(mol <sub>CH<sub>4</sub></sub> h <sup>-1</sup> g <sub>Pt</sub> <sup>-1</sup> ) | TOF<br>(s <sup>-1</sup> ) |
|-------------------------------------------------------|---------------|------------------------------------------------------------------------|-------------------------------------------------------------------------------------------------|---------------------------|
| 1Pt/Fe <sub>2</sub> O <sub>3</sub> -NP <sup>a</sup>   | 17            | 176,000                                                                | 0.47                                                                                            | 0.086                     |
| 1Pt/Fe <sub>2</sub> O <sub>3</sub> -C700 <sup>a</sup> | 6             | 500,000                                                                | 2.01                                                                                            | 0.1                       |
| Pt/Al <sub>2</sub> O <sub>3</sub> <sup>b</sup>        | 200           |                                                                        | 0.093                                                                                           |                           |

<sup>a</sup>The gas feed was 0.5 vol% CH<sub>4</sub> / 3 vol% O<sub>2</sub> / 97 % He balance (50 mL min<sup>-1</sup>) to control the CH<sub>4</sub> conversion at 700 °C below 20 %. <sup>b</sup>Estimated from ref <sup>1</sup>: 100 % CH<sub>4</sub> conversion, 1.9 wt% Pt.

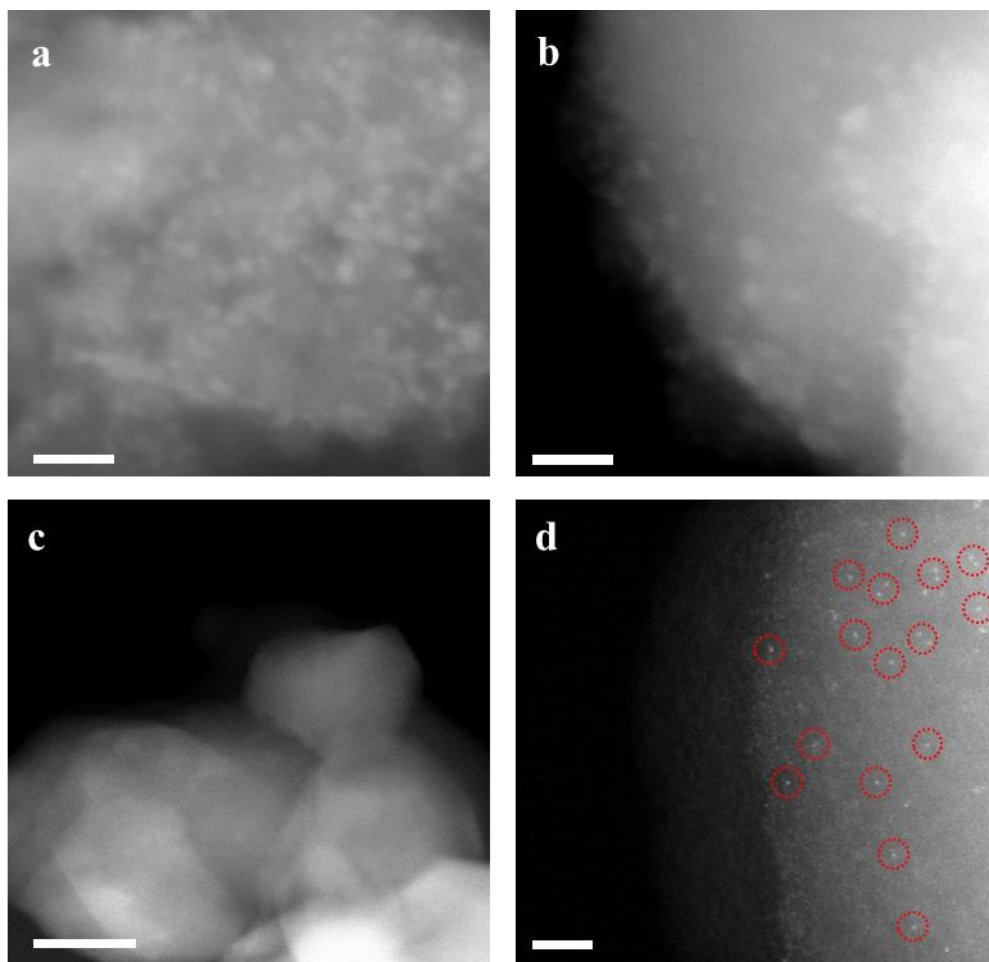

**Supplementary Figure 15. STEM images of  $\text{H}_2\text{PtCl}_6/\text{Fe}_2\text{O}_3$  before and after calcination.**

(a-b) HRSTEM images of 1 wt%  $\text{H}_2\text{PtCl}_6$  deposited on  $\text{Fe}_2\text{O}_3$  and heated to 300 °C for 5 h under air showing the formation of small Pt NPs. 10 nm scale bar for panel a, and 5 nm scale bar for panel b. (c) Low-resolution STEM image, and (d) AC-HRSTEM images following 800 °C calcination under air for 5 h, demonstrate complete dispersion of Pt NPs as isolated atoms (circled in red). 20 nm scale bar for panel c, and 2 nm scale bar for panel d.

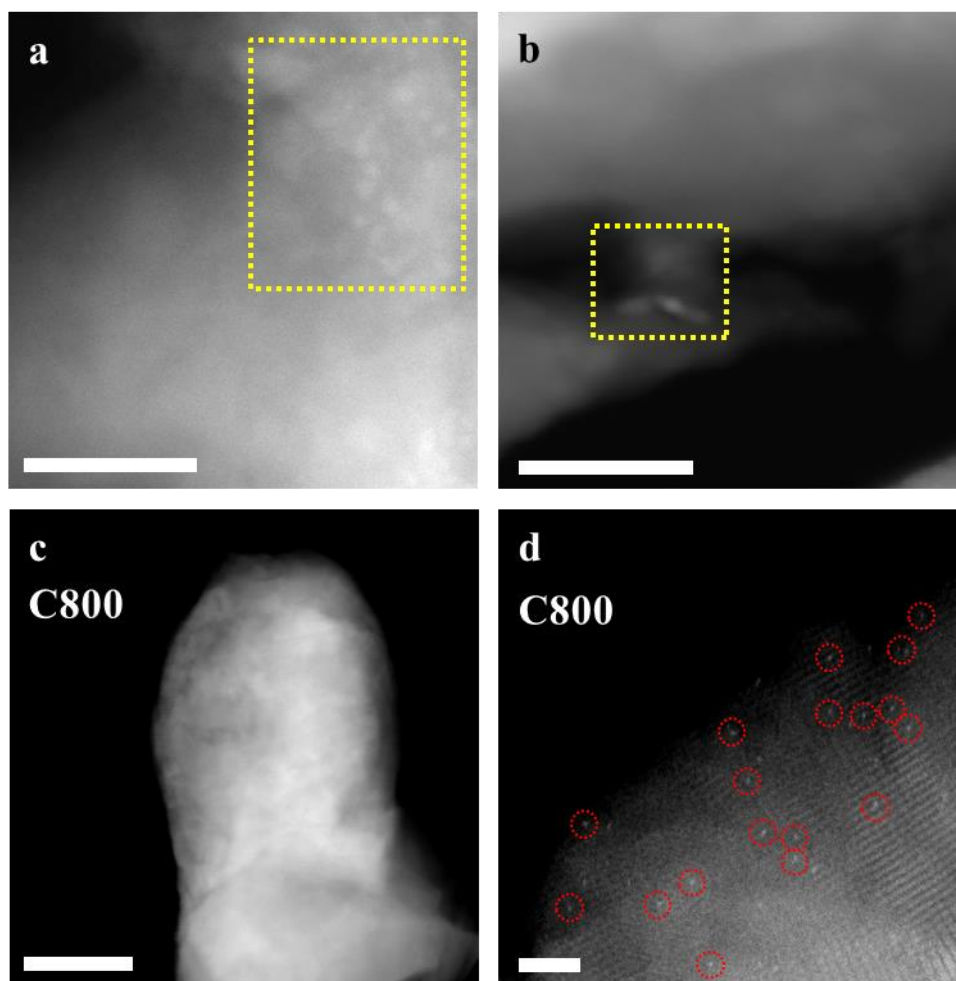

**Supplementary Figure 16. STEM images of  $\text{H}_2\text{PtCl}_6/\text{Fe}_2\text{O}_3(\text{N})$  before and after calcination.**

(a-b) HRSTEM images of 0.2 wt%  $\text{H}_2\text{PtCl}_6$  deposited on  $\text{Fe}_2\text{O}_3(\text{N})$  and heated to 300 °C for 5 h under air showing the formation of small Pt NPs (highlighted in yellow squares). 20 nm scale bars. (c) Low-resolution STEM image, and (d) AC-HRSTEM images following 800 °C calcination under air for 5 h, demonstrate complete dispersion of Pt NPs as isolated atoms (circled in red). 50 nm scale bar for panel c, and 2 nm scale bar for panel d.

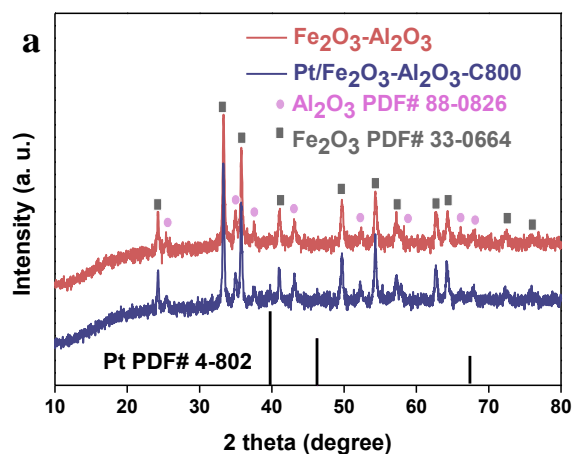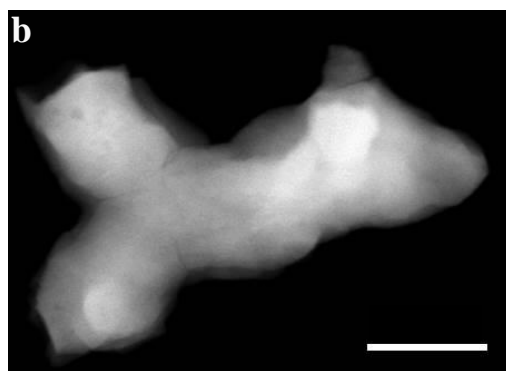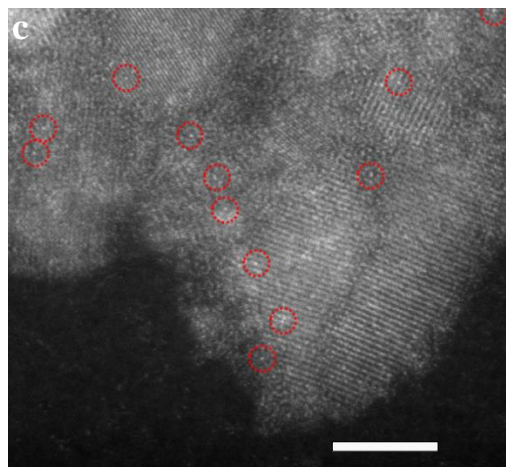

**Supplementary Figure 17. Characterization of Pt/Fe<sub>2</sub>O<sub>3</sub>-Al<sub>2</sub>O<sub>3</sub>-C800.**

(a) XRD pattern of Fe<sub>2</sub>O<sub>3</sub>-Al<sub>2</sub>O<sub>3</sub> support and Pt/Fe<sub>2</sub>O<sub>3</sub>-Al<sub>2</sub>O<sub>3</sub>-C800 evidence only reflections characteristic of Al<sub>2</sub>O<sub>3</sub> and Fe<sub>2</sub>O<sub>3</sub>, but none of any Pt phase. (b) Low resolution, and (c) HRSTEM images confirm the absence of any Pt NP over the Fe<sub>2</sub>O<sub>3</sub>-Al<sub>2</sub>O<sub>3</sub> support and existence of atomically-dispersed Pt atoms (circled in red). 100 nm scale bar for panel b, and 5 nm scale bar for panel c.

**Supplementary Appendix I: Experimental studies of single atoms located at support defects.**

| Entry | sample                                                | location                          | ref |
|-------|-------------------------------------------------------|-----------------------------------|-----|
| 1     | Pd/MgO                                                | O vacancy                         | 2   |
| 2     | Pt/Al <sub>2</sub> O <sub>3</sub>                     | Al <sup>3+</sup> <sub>penta</sub> | 3   |
| 3     | Pd/Al <sub>2</sub> O <sub>3</sub>                     | defect                            | 4   |
| 4     | Fe/SiO <sub>2</sub>                                   | Si vacancy                        | 5   |
| 5     | Pt/C                                                  | defect                            | 6   |
| 6     | Pd/C                                                  | defect                            | 7   |
| 7     | Pt/C                                                  | vacancy                           | 8   |
| 8     | Fe, Co, Ni/C                                          | vacancy                           | 9   |
| 9     | Pd/C                                                  | vacancy                           | 10  |
| 10    | Co-Pt/C                                               | defect                            | 11  |
| 11    | Pd/mpg-C <sub>3</sub> N <sub>4</sub>                  | “six-fold Cavities”               | 12  |
| 12    | Ir,Au,Pd,Ag,Pt/C                                      | defect                            | 13  |
| 13    | Pd/graphene                                           | vacancies                         | 14  |
| 14    | Pt/graphene                                           | defects                           | 15  |
| 15    | Pt,Co, In/graphene                                    | vacancies                         | 16  |
| 16    | Pt/MoS <sub>2</sub>                                   | S vacancy                         | 17  |
| 17    | Co/MoS <sub>2</sub>                                   | defect                            | 18  |
| 18    | Pt/CeO <sub>2</sub>                                   | defects                           | 19  |
| 19    | Au/CeO <sub>2</sub>                                   | O defect                          | 20  |
| 20    | Au/CeO <sub>2</sub>                                   | O vacancy                         | 21  |
| 21    | Au/CeO <sub>2</sub>                                   | Ce vacancy                        | 22  |
| 22    | Pt/CeO <sub>2</sub>                                   | step edges                        | 23  |
| 23    | Pt/CeO <sub>2</sub>                                   | Nano pocket                       | 24  |
| 24    | Pt/CeO <sub>2</sub>                                   | O vacancy                         | 25  |
| 25    | Pt/FeO <sub>x</sub>                                   | O vacancy                         | 26  |
| 26    | Co/Fe <sub>3</sub> O <sub>4</sub> (001)               | octahedral vacancies              | 27  |
| 27    | Ni/Fe <sub>3</sub> O <sub>4</sub> (001)               | cation vacancies                  | 28  |
| 28    | Cu, Ag/Fe <sub>3</sub> O <sub>4</sub> (001)           | “narrow” site                     | 29  |
| 29    | Au/Fe <sub>3</sub> O <sub>4</sub> (001)               | “narrow” hollow site              | 30  |
| 30    | Ni, Co, Mn, Ti, and Zr/Fe <sub>3</sub> O <sub>4</sub> | cation vacancy                    | 31  |
| 31    | Rh/CoO                                                | O vacancy                         | 32  |
| 32    | Pt/Ni(OH) <sub>x</sub>                                | Ni <sup>2+</sup> vacancy          | 33  |
| 33    | Pt, Au/ZnO                                            | Zn vacancy                        | 34  |
| 34    | Rh/ZnO                                                | vacancy                           | 35  |
| 35    | Au/TiO <sub>2</sub>                                   | O vacancy                         | 36  |
| 36    | Pt/TiO <sub>2</sub>                                   | Defect                            | 37  |
| 37    | Pt/TiO <sub>2</sub>                                   | O vacancy                         | 38  |
| 38    | Pd/TiO <sub>2</sub>                                   | defects                           | 39  |
| 39    | Pt/WO <sub>x</sub>                                    | O vacancy                         | 40  |

## Supplementary Appendix II: DFT studies of single atoms located at support defects.

| Entry | sample                                                 | location  | ref |
|-------|--------------------------------------------------------|-----------|-----|
| 1     | Pt/NB                                                  | defects   | 41  |
| 2     | Pd/NB                                                  | B vacancy | 42  |
| 3     | Fe/MoS <sub>2</sub>                                    | S vacancy | 43  |
| 4     | Rh/CoO                                                 | O vacancy | 44  |
| 5     | Co/graphene                                            | vacancy   | 45  |
| 6     | Au/graphene                                            | defect    | 46  |
| 7     | M/FeO <sub>x</sub> (M = Au, Rh, Pd, Co, Cu, Ru and Ti) | O vacancy | 47  |
| 8     | Au/CeO <sub>2</sub>                                    | O vacancy | 48  |
| 9     | Au/CeO <sub>2</sub>                                    | O defect  | 49  |

## Supplementary Appendix III: Reviews citing the localization of single atoms at support defects.

| Entry | Title                                                                                             | ref |
|-------|---------------------------------------------------------------------------------------------------|-----|
| 1     | Preparation, characterization and catalytic performance of single-atom catalysts.                 | 50  |
| 2     | Increasing the range of non-noble-metal single-atom catalysts.                                    | 51  |
| 3     | Two-dimensional materials confining single atoms for catalysis.                                   | 52  |
| 4     | Atomically dispersed supported metal catalysts.                                                   | 53  |
| 5     | Single-atom catalysts: A new frontier in heterogeneous catalysis.                                 | 54  |
| 6     | Catalysis by supported single metal atoms.                                                        | 55  |
| 7     | The power of single-atom catalysis.                                                               | 56  |
| 8     | Atomically dispersed supported metal catalysts: perspectives and suggestions for future research. | 57  |
| 9     | Single-atom electrocatalysts.                                                                     | 58  |
| 10    | Metal catalysts for heterogeneous catalysis: from single atoms to nanoclusters and nanoparticles. | 59  |
| 11    | Strategies for stabilizing atomically dispersed metal catalysts.                                  | 60  |
| 12    | Single-atom catalysts: emerging multifunctional materials in heterogeneous catalysis              | 61  |
| 13    | Heterogeneous single-atom catalysis.                                                              | 62  |
| 14    | Unravelling single atom catalysis: The surface science approach.                                  | 63  |



## Supplementary References

- 1 Urfels, L., G  in, P., Primet, M. & Tena, E. Complete oxidation of methane at low temperature over Pt catalysts supported on high surface area SnO<sub>2</sub>. *Top. Catal.* **30**, 427-432 (2004).
- 2 Abbet, S. *et al.* Acetylene cyclotrimerization on supported size-selected Pd<sub>n</sub> clusters (1 ≤ n ≤ 30): one atom is enough! *J. Am. Chem. Soc.* **122**, 3453-3457 (2000).
- 3 Kwak, J. H. *et al.* Coordinatively unsaturated Al<sup>3+</sup> centers as binding sites for active catalyst phases of platinum on γ-Al<sub>2</sub>O<sub>3</sub>. *Science* **325**, 1670-1673 (2009).
- 4 Hackett, S. F. J. *et al.* High-activity, single-site mesoporous Pd/Al<sub>2</sub>O<sub>3</sub> catalysts for selective aerobic oxidation of allylic alcohols. *Angew. Chem., Int. Ed.* **46**, 8593-8596 (2007).
- 5 Hu, B. *et al.* Isolated Fe<sup>II</sup> on silica as a selective propane dehydrogenation catalyst. *ACS Catal.* **5**, 3494-3503 (2015).
- 6 Wei, H. *et al.* Iced photochemical reduction to synthesize atomically dispersed metals by suppressing nanocrystal growth. *Nat. Commun.* **8**, 1490 (2017).
- 7 Wei, S. *et al.* Direct observation of noble metal nanoparticles transforming to thermally stable single atoms. *Nat. Nanotechnol.* **13**, 856-861 (2018).
- 8 Bulushev, D. A. *et al.* Single atoms of Pt-group metals stabilized by N-doped carbon nanofibers for efficient hydrogen production from formic acid. *ACS Catal.* **6**, 3442-3451 (2016).
- 9 Fei, H. *et al.* General synthesis and definitive structural identification of MN<sub>4</sub>C<sub>4</sub> single-atom catalysts with tunable electrocatalytic activities. *Nat. Catal.* **1**, 63-72 (2018).
- 10 Bulushev, D. A. *et al.* Single isolated Pd<sup>2+</sup> cations supported on N-doped carbon as active sites for hydrogen production from formic acid decomposition. *ACS Catal.* **6**, 681-691 (2016).
- 11 Zhang, L. *et al.* Coordination of atomic Co-Pt coupling species at carbon defects as active sites for oxygen reduction reaction. *J. Am. Chem. Soc.* **140**, 10757-10763 (2018).
- 12 Vile, G. *et al.* A stable single-site palladium catalyst for hydrogenations. *Angew. Chem. Int. Ed.* **54**, 11265-11269 (2015).
- 13 Chen, Z. *et al.* Stabilization of single metal atoms on graphitic carbon nitride. *Adv. Funct. Mater.* **27**, 1605785 (2017).
- 14 Yan, H. *et al.* Single-atom Pd<sub>1</sub>/graphene catalyst achieved by atomic layer deposition: remarkable performance in selective hydrogenation of 1,3-butadiene. *J. Am. Chem. Soc.* **137**, 10484-10487 (2015).
- 15 Sun, S. *et al.* Single-atom catalysis using Pt/graphene achieved through atomic layer deposition. *Sci. Rep.* **3**, 1775 (2013).
- 16 Wang, H. *et al.* Doping monolayer graphene with single atom substitutions. *Nano Lett.* **12**, 141-144 (2012).
- 17 Li, H. *et al.* Atomic structure and dynamics of single platinum atom interactions with monolayer MoS<sub>2</sub>. *ACS Nano* **11**, 3392-3403 (2017).
- 18 Liu, G. *et al.* MoS<sub>2</sub> monolayer catalyst doped with isolated Co atoms for the hydrodeoxygenation reaction. *Nat. Chem.* **9**, 810-816 (2017).
- 19 Jones, J. *et al.* Thermally stable single-atom platinum-on-ceria catalysts via atom trapping. *Science* **353**, 150-154 (2016).

- 20 Fu, Q., Deng, W., Saltsburg, H. & Flytzani-Stephanopoulos, M. Activity and stability of  
low-content gold–cerium oxide catalysts for the water–gas shift reaction. *Appl. Catal., B*  
**56**, 57-68 (2005).
- 21 Fu, Q., Saltsburg, H. & Flytzani-Stephanopoulos, M. Active nonmetallic Au and Pt  
species on ceria-based water-gas shift catalysts. *Science* **301**, 935-938 (2003).
- 22 Qiao, B. *et al.* Highly efficient catalysis of preferential oxidation of CO in H<sub>2</sub>-rich stream  
by gold single-atom catalysts. *ACS Catal.* **5**, 6249-6254 (2015).
- 23 Dvorak, F. *et al.* Creating single-atom Pt-ceria catalysts by surface step decoration. *Nat.*  
*Commun.* **7**, 10801 (2016).
- 24 Bruix, A. *et al.* Maximum noble-metal efficiency in catalytic materials: atomically  
dispersed surface platinum. *Angew. Chem. Int. Ed.* **53**, 10525-10530 (2014).
- 25 Xie, P. *et al.* Nanoceria-supported single-atom platinum catalysts for direct methane  
conversion. *ACS Catal.*, 4044-4048 (2018).
- 26 Wei, H. *et al.* FeO<sub>x</sub>-supported platinum single-atom and pseudo-single-atom catalysts for  
chemoselective hydrogenation of functionalized nitroarenes. *Nat. Commun.* **5**, 5634  
(2014).
- 27 Gargallo-Caballero, R. *et al.* Co on Fe<sub>3</sub>O<sub>4</sub>(001): Towards precise control of surface  
properties. *J. Chem. Phys.* **144**, 094704 (2016).
- 28 Ryan, P. T. P. *et al.* Direct measurement of Ni incorporation into Fe<sub>3</sub>O<sub>4</sub>(001). *Phys Chem*  
*Chem Phys* **20**, 16469-16476 (2018).
- 29 Meier, M. *et al.* Probing the geometry of copper and silver adatoms on magnetite:  
quantitative experiment versus theory. *Nanoscale* **10**, 2226-2230 (2018).
- 30 Novotny, Z. *et al.* Ordered array of single adatoms with remarkable thermal stability:  
Au/Fe<sub>3</sub>O<sub>4</sub>(001). *Phys. Rev. Lett.* **108**, 216103 (2012).
- 31 Bliem, R. *et al.* Adsorption and incorporation of transition metals at the magnetite  
Fe<sub>3</sub>O<sub>4</sub>(001) surface. *Phys. Rev. B* **92**, 075440 (2015).
- 32 Zhang, S. *et al.* Catalysis on singly dispersed bimetallic sites. *Nat. Commun.* **6**, 7938  
(2015).
- 33 Zhang, J. *et al.* Cation vacancy stabilization of single-atomic-site Pt<sub>1</sub>/Ni(OH)<sub>x</sub> catalyst for  
diboration of alkynes and alkenes. *Nat. Commun.* **9**, 1002 (2018).
- 34 Gu, X.-K. *et al.* Supported single Pt<sub>1</sub>/Au<sub>1</sub> atoms for methanol steam reforming. *ACS Catal.*  
**4**, 3886-3890 (2014).
- 35 Lang, R. *et al.* Hydroformylation of olefins by a rhodium single-atom catalyst with  
activity comparable to RhCl(PPh<sub>3</sub>)<sub>3</sub>. *Angew. Chem. Int. Ed.* **55**, 16054-16058 (2016).
- 36 Wan, J. *et al.* Defect effects on TiO<sub>2</sub> nanosheets: stabilizing single atomic site Au and  
promoting catalytic properties. *Adv. Mater.* **30**, doi: 10.1002/adma.201705369 (2018).
- 37 DeRita, L. *et al.* Catalyst architecture for stable single atom dispersion enables site-  
specific spectroscopic and reactivity measurements of CO adsorbed to Pt atoms, oxidized  
Pt clusters, and metallic Pt clusters on TiO<sub>2</sub>. *J. Am. Chem. Soc.* **139**, 14150-14165 (2017).
- 38 Sasahara, A., Pang, C. L. & Onishi, H. Probe microscope observation of platinum atoms  
deposited on the TiO<sub>2</sub>(110)-(1 × 1) surface. *J. Phys. Chem. B* **110**, 13453-13457 (2006).
- 39 Liu, P. *et al.* Photochemical route for synthesizing atomically dispersed palladium  
catalysts. *Science* **352**, 797-800 (2016).
- 40 Wang, J. *et al.* Hydrogenolysis of glycerol to 1,3-propanediol under low hydrogen  
pressure over WO<sub>x</sub>-supported single/pseudo-single atom Pt catalyst. *ChemSusChem* **9**,  
784-790 (2016).

- 41 Liu, X., Duan, T., Meng, C. & Han, Y. Pt atoms stabilized on hexagonal boron nitride as  
efficient single-atom catalysts for CO oxidation: a first-principles investigation. *RSC Adv.*  
5, 10452-10459 (2015).
- 42 Lu, Z. *et al.* Pd<sub>1</sub>/BN as a promising single atom catalyst of CO oxidation: a dispersion-  
corrected density functional theory study. *RSC Adv.* 5, 84381-84388 (2015).
- 43 Ma, D. *et al.* CO catalytic oxidation on iron-embedded monolayer MoS<sub>2</sub>. *Appl. Surf. Sci.*  
328, 71-77 (2015).
- 44 Ma, X. L., Liu, J. C., Xiao, H. & Li, J. Surface single-cluster catalyst for N<sub>2</sub>-to-NH<sub>3</sub>  
thermal conversion. *J. Am. Chem. Soc.* 140, 46-49 (2018).
- 45 Tang, Y. *et al.* Adsorption behavior of Co anchored on graphene sheets toward NO, SO<sub>2</sub>,  
NH<sub>3</sub>, CO and HCN molecules. *Appl. Surf. Sci.* 342, 191-199 (2015).
- 46 Liu, X. *et al.* Defect stabilized gold atoms on graphene as potential catalysts for ethylene  
epoxidation: a first-principles investigation. *Catal. Sci. Technol.* 6, 1632-1641 (2016).
- 47 Li, F., Li, Y., Zeng, X. C. & Chen, Z. Exploration of high-performance single-atom  
catalysts on support M<sub>1</sub>/FeO<sub>x</sub> for CO oxidation via computational study. *ACS Catal.* 5,  
544-552 (2015).
- 48 Camellone, M. F. & Fabris, S. Reaction mechanisms for the CO oxidation on Au/CeO<sub>2</sub>  
catalysts: activity of substitutional Au<sup>3+</sup>/Au<sup>+</sup> cations and deactivation of supported Au<sup>+</sup>  
adatoms. *J. Am. Chem. Soc.* 131, 10473-10483 (2009).
- 49 Wang, Y.-G., Mei, D., Glezakou, V.-A., Li, J. & Rousseau, R. Dynamic formation of  
single-atom catalytic active sites on ceria-supported gold nanoparticles. *Nat. Commun.* 6,  
6511 (2015).
- 50 Wang, L. Q. *et al.* Preparation, characterization and catalytic performance of single-atom  
catalysts. *Chin. J. Catal.* 38, 1528-1539 (2017).
- 51 Deng, T., Zheng, W. T. & Zhang, W. Increasing the range of non-noble-metal single-atom  
catalysts. *Chin. J. Catal.* 38, 1489-1497 (2017).
- 52 Wang, Y., Zhang, W. H., Deng, D. H. & Bao, X. H. Two-dimensional materials confining  
single atoms for catalysis. *Chin. J. Catal.* 38, 1443-1453 (2017).
- 53 Flytzani-Stephanopoulos, M. & Gates, B. C. Atomically dispersed supported metal  
catalysts. *Annu. Rev. Chem. Biomol. Eng.* 3, 545-574 (2012).
- 54 Yang, X.-F. *et al.* Single-atom catalysts: a new frontier in heterogeneous catalysis. *Acc.*  
*Chem. Res.* 46, 1740-1748 (2013).
- 55 Liu, J. Catalysis by supported single metal atoms. *ACS Catal.* 7, 34-59 (2016).
- 56 Liang, S., Hao, C. & Shi, Y. The power of single-atom catalysis. *ChemCatChem* 7, 2559-  
2567 (2015).
- 57 Gates, B. C., Flytzani-Stephanopoulos, M., Dixon, D. A. & Katz, A. Atomically dispersed  
supported metal catalysts: perspectives and suggestions for future research. *Catal. Sci.*  
*Technol.* 7, 4259-4275 (2017).
- 58 Zhu, C., Fu, S., Shi, Q., Du, D. & Lin, Y. Single-atom electrocatalysts. *Angew. Chem. Int.*  
*Ed.* 56, 13944-13960 (2017).
- 59 Liu, L. & Corma, A. Metal catalysts for heterogeneous catalysis: from single atoms to  
nanoclusters and nanoparticles. *Chem. Rev.* 118, 4981-5079 (2018).
- 60 Qin, R., Liu, P., Fu, G. & Zheng, N. Strategies for stabilizing atomically dispersed metal  
catalysts. *Small Methods* 2, 1700286 (2018).
- 61 Zhang, H., Liu, G., Shi, L. & Ye, J. Single-atom catalysts: emerging multifunctional  
materials in heterogeneous catalysis. *Adv. Energy Mater.* 8, 1701343 (2018).

- 62 Wang, A. Q., Li, J. & Zhang, T. Heterogeneous single-atom catalysis. *Nat. Rev. Chem.* **2**, 65-81 (2018).
- 63 Parkinson, G. S. Unravelling single atom catalysis: The surface science approach. *Chin. J. Catal.* **38**, 1454-1459 (2017).
