# Supplementary material for: Non defect-stabilized thermally stable single-atom catalyst
Source: PubMed Central journal article supplement (PMC6335577; doi:10.1038/s41467-018-08136-3), 2019-01-16
Supplement: 41467_2018_8136_MOESM3_ESM.pdf [file 41467_2018_8136_MOESM3_ESM.pdf]

## **Description of Additional Supplementary Files**

File Name: Supplementary Movie 1

Description: In situ TEM characterization of Pt nanoparticle oxidative dispersion.
